# Supplementary material
Source: Springer Nature journal article supplement (https://www.springermedizin.de/resource/supplementary/12963_2009_90_MOESM2_ESM.pdf/9572672)

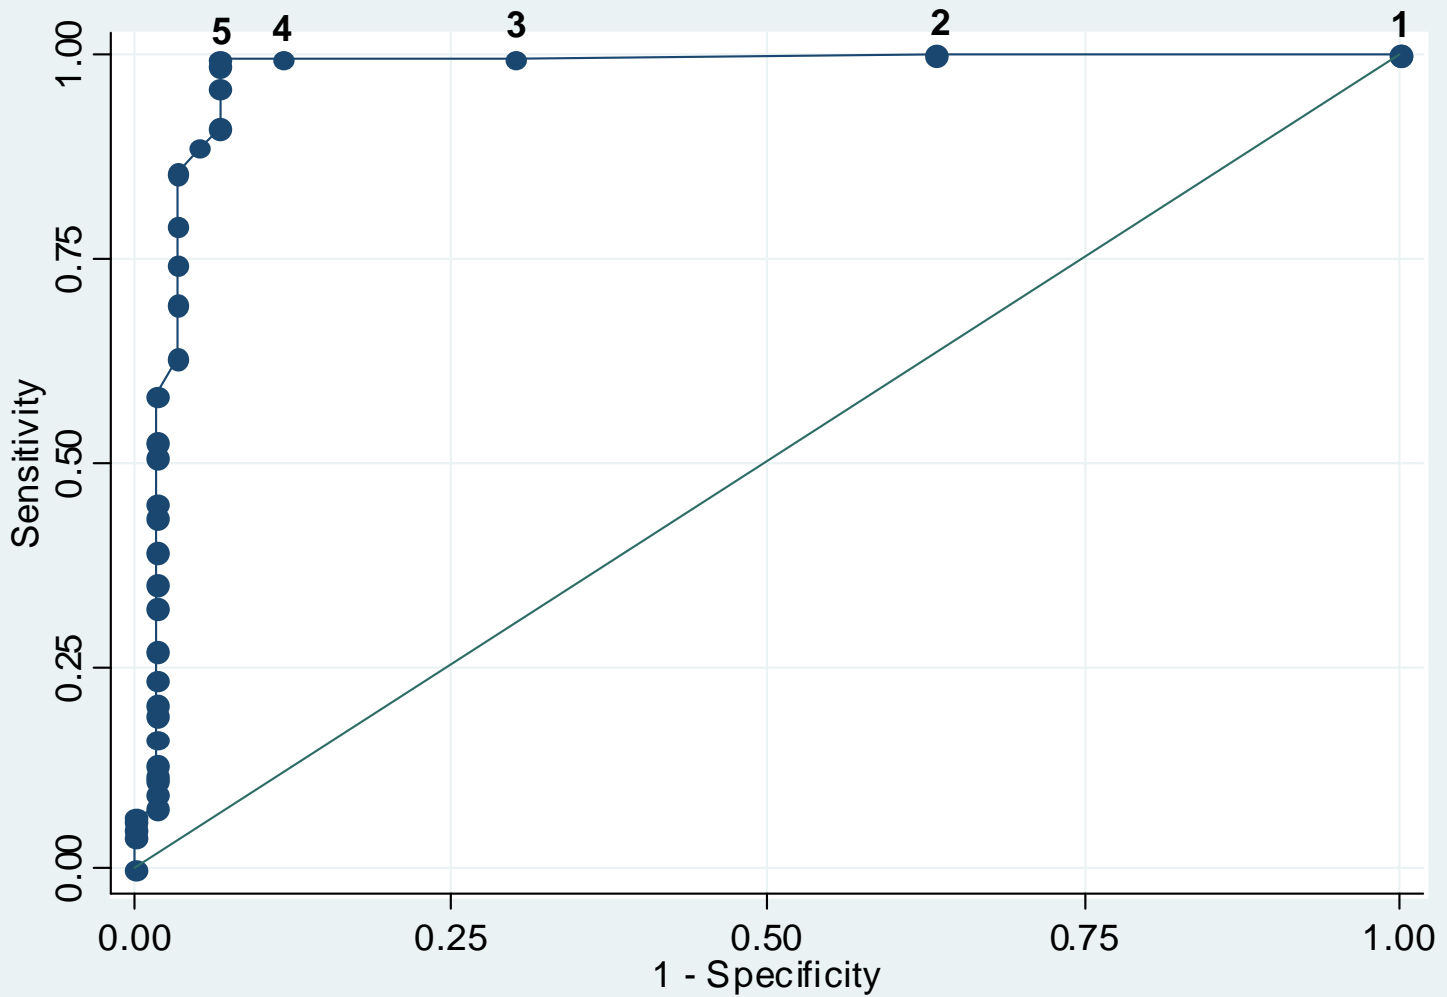

Area under ROC curve = 0.9725

Supplement: MOESM2 [file 9572672]
